# Supplementary material for: Health-related quality of life and insulin resistance over a 10-year follow-up
Source: PubMed Central journal article supplement (PMC8692503; doi:10.1038/s41598-021-03791-x), 2021-12-21
Supplement: 41598_2021_3791_MOESM1_ESM.pdf [file 41598_2021_3791_MOESM1_ESM.pdf]

## GENERAL DATA QUESTIONNAIRE

**Attention:** After the reading all the answers, choose the one that is most acceptable to you and circle the number next to the option you have chosen. Please, answer very detail the questions presented without standard statements.

1. **Code** \_\_\_\_\_
2. **Date** day-month-year \_\_\_\_\_
3. **Sex**  
Female   
Male
4. **Date of birth** \_\_\_\_\_
5. **Family status**  
Married/living with someone   
Single   
Divorced   
Widowed
6. **Education**  
Primary   
Not finished secondary   
Secondary/College   
University
7. **What kind of work do you do for most of the year?**  
Agricultural and forestry work   
Industry, buiding etc.   
Student   
Housewife   
Retired   
Unemployed   
Office, mental job, service sector   
Other
8. **Work regime:**  
Only daytime   
Daytime/night time (Shift work)
9. **Average income per family member/month?** \_\_\_\_\_

## SELF-EVALUATED HEALTH QUESTIONNAIRE

**Attention:** After the reading all the answers, choose the one that is most acceptable to you and circle the number next to the option you have chosen. Please, answer very detail the questions presented without standard statements.

**1. How do you assess the current health?**

Good  Rather good  Fair  Rather poor  Poor

**2. How many times do you attend the doctor (In-hospital, out-patient department, except odontologist) during the last 12 months? \_\_\_\_\_**

If no visits, mark the š0š.

**3. Have you experienced stress in the last month?**

No at all

Yes, a little, but I don't usually experience it

Yes, but other persons experience more than usually

Yes, my life is just unbearable

**4. Have you experienced following pain during last month at night:**

**Attention:** Please mark in each row of the table + prie šYesš arba šNoš. No rows in the table can be left blank.

|    | Pain               | Yes | No |
|----|--------------------|-----|----|
| 1. | Headache           |     |    |
| 2. | Stomach ache       |     |    |
| 3. | Toothache          |     |    |
| 4. | Joint pain         |     |    |
| 5. | Diabetic foot pain |     |    |
| 6. | Back pain          |     |    |
| 7. | Lower back pain    |     |    |
| 8. | Muscle ache        |     |    |
| 9. | Other pain         |     |    |

**5. Which of these diseases have you been diagnosed with and treated in the last 12 months?**

**Attention:** Please mark in each row of the table + prie šYesõ arba šNoõ. No rows in the table can be left blank.

|     | <b>Diseases</b>                     | <b>Yes</b> | <b>No</b> |
|-----|-------------------------------------|------------|-----------|
| 1.  | Arterial hypertension               |            |           |
| 2.  | Diabetes mellitus                   |            |           |
| 3.  | Myocardial infarction (Heart attac) |            |           |
| 4.  | Angina pectoris                     |            |           |
| 5.  | Coronary artery disease             |            |           |
| 6.  | Rheumatic arthritis                 |            |           |
| 7.  | Spinal diseases                     |            |           |
| 8.  | Emphysema (pulmonary enlargement)   |            |           |
| 9.  | Chronic bronchitis or asthma        |            |           |
| 10. | Chronic pyelonephritis              |            |           |
| 11. | Others                              |            |           |

**6. Have you taken any medication in the last month:**

**Attention:** Please mark in each row of the table + prie šYesõ arba šNoõ. No rows in the table can be left blank.

|     | <b>Medicines</b>         | <b>Yes</b> | <b>No</b> |
|-----|--------------------------|------------|-----------|
| 1.  | Sedatives                |            |           |
| 2.  | Sleeping pills           |            |           |
| 3.  | Antialergics             |            |           |
| 4.  | Antidepressants          |            |           |
| 5.  | Pain-relieving medicines |            |           |
| 6.  | Antihypertensives        |            |           |
| 7.  | Antiarrhythmics          |            |           |
| 8.  | Anticholesterol drugs    |            |           |
| 9.  | Cough-reducing medicines |            |           |
| 10. | Others                   |            |           |

## LIFESTYLE ASSESSMENT QUESTIONNAIRE

### Smoking

1. Are you currently smoking?

Yes, regularly  Sometimes  No

If "No", please, continue to answer the questions in the next section "Alcohol".

2. How many cigarettes, papiroses or pipes you smoke per day on average?

1-5 ; 6-14 ; 15-25  > 25

### Alcohol

1. How often do you drink alcohol (including beer)?

Daily ; 2-3 times per week ; Once per week ; 2-3 times per month

Several times per year ; Don't use it at all .

### Physical activity during the last year

1. How many minutes during a normal work day do you sit (If you are not working or usually during the day)?

\_\_\_\_\_ minutes

2. How many minutes a day do you walk?

\_\_\_\_\_ minutes
